# Supplementary material
Source: Springer Nature journal article supplement (https://www.springermedizin.de/resource/supplementary/12874_2010_518_MOESM1_ESM.pdf/9432478)
Supplement: MOESM1 [file 9432478]

Survivors listed on registry who potentially met eligibility criteria n=468

**Stage 1.**

**Clinician provided consent to contact cancer survivor**

Registry contacted the cancer survivor's clinician to gain consent for researchers to approach the patient

Clinician reported survivors ineligible n=57

**All potentially eligible survivors n=411**

Unable to contact clinician n=134  
**(33% of all potentially eligible survivors)**

Clinician did not provide consent n=45  
**(11% of all potentially eligible survivors)**

Clinician provided consent to contact n=232  
**(56% of all potentially eligible survivors)**

**Stage 2.**

**Cancer survivor consented to pass on contact details to researchers**

Registry contacted the cancer survivor to gain consent for researchers to approach them

Unable to contact cancer survivor n=150  
(65% of those with clinician consent)  
**(36% of all potentially eligible survivors)**

Survivor did not return consent form n=18  
(7.8% of those with clinician consent)  
**(4.3% of all potentially eligible survivors)**

Survivor provided consent to contact n=64  
(28% of those with clinician consent)  
**(16% of all potentially eligible survivors)**

**Stage 3.**

**Cancer survivor consented to participate in study**

Researchers contacted the cancer survivor to gain consent to participate in research

Unable to contact cancer survivor n=12  
(19% of those who agreed to be contacted)  
**(2.9% of all potentially eligible survivors)**

Survivor did not return questionnaire n=20  
(31% of those who agreed to be contacted)  
**(4.9% of all potentially eligible survivors)**

Survivor returned questionnaire n=32  
(50% of those who agreed to be contacted)  
**(7.8% of all potentially eligible survivors)**

Researchers included the survivor's data in the research study
